# Supplementary material for: The CIC-ERF co-deletion underlies fusion-independent activation of ETS family member, ETV1, to drive prostate cancer progression
Source: eLife journal article supplement (doi:10.7554/elife.77072), 2022-10-28
Supplement: fig3-figsupp1-data3 [file Supplementary figure 3-figure supplement I-Source data.pdf › Figure 3 - figure supplement 1 - source data 3/Supplementary figure 3-figure supplement I-Source data.pdf]

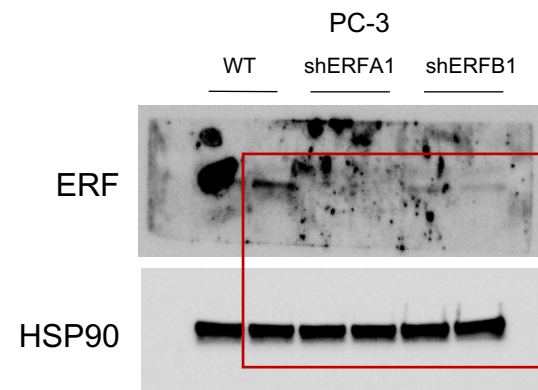

**Supplementary figure 3-figure supplement 1-Source data:** Full length western blot images of ERF and HSP90 in PC3 cells with its variants. Cropped images and description shown in supplementary Figure 2i.
