# Supplementary material for: The CIC-ERF co-deletion underlies fusion-independent activation of ETS family member, ETV1, to drive prostate cancer progression
Source: eLife journal article supplement (doi:10.7554/elife.77072), 2022-10-28
Supplement: fig4-data1 [file figure 4E-source data.pdf › Figure 4 - source data 1/figure 4E-source data.pdf]

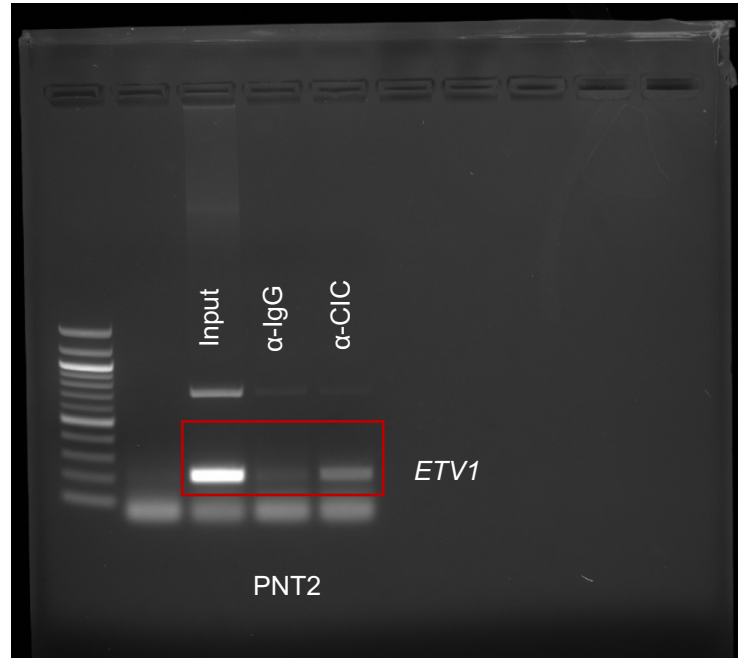

**Figure 4- figure supplement E- source data :** Full length PCR gel images of ETV1 after CIC pull down in PNT2 cells. Cropped images and description shown in Figure 4e.
