# Supplementary material for: The CIC-ERF co-deletion underlies fusion-independent activation of ETS family member, ETV1, to drive prostate cancer progression
Source: eLife journal article supplement (doi:10.7554/elife.77072), 2022-10-28
Supplement: fig4-data2 [file Figure 4F-source data.pdf › Figure 4 - source data 2/Figure 4F-source data.pdf]

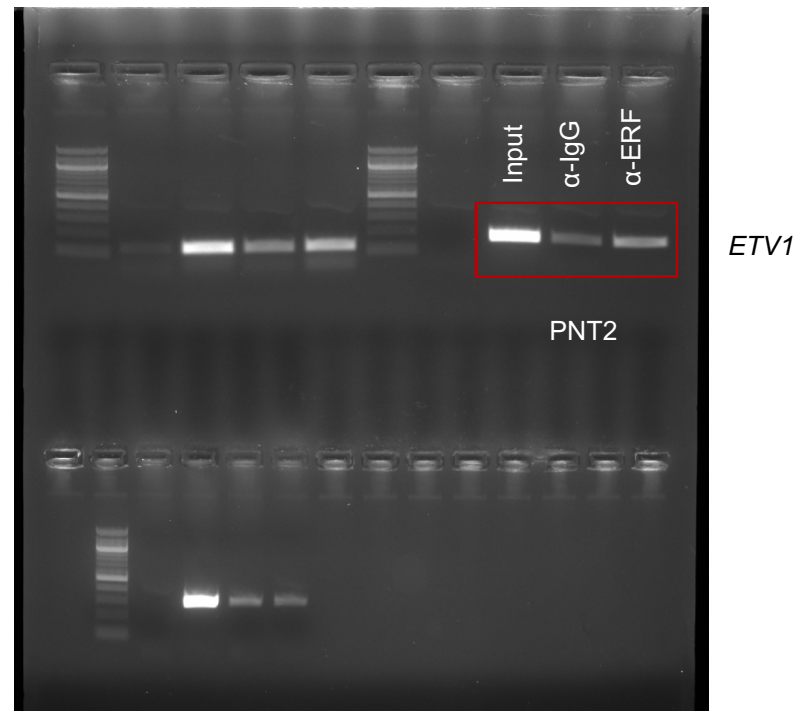

**Figure 4- figure supplement F-source data :** Full length PCR gel images of ETV1 after ERF pull down in PNT2 cells. Cropped images and description shown in Figure 4f.
