# Supplementary material for: The CIC-ERF co-deletion underlies fusion-independent activation of ETS family member, ETV1, to drive prostate cancer progression
Source: eLife journal article supplement (doi:10.7554/elife.77072), 2022-10-28
Supplement: fig4-data3 [file elife-77072-fig4-data3-v1.zip]

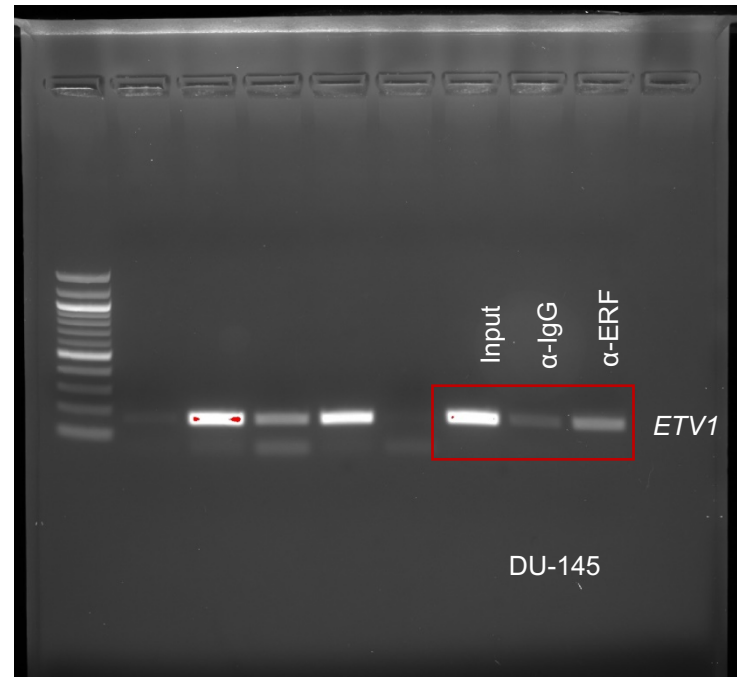

**Figure 4- figure supplement G- source data :** Full length PCR gel images of ETV1 after ERF pull down in DU-145 cells. Cropped images and description shown in Figure 4g.
