# Supplementary material for: The CIC-ERF co-deletion underlies fusion-independent activation of ETS family member, ETV1, to drive prostate cancer progression
Source: eLife. 2022 Nov 16;11:e77072. doi: 10.7554/eLife.77072 (PMC9668335; doi:10.7554/eLife.77072)
Supplement: Figure 1—source data 1. — Studies that analyzed predominantly primary prostate cancers (green) and metastatic castrate resistant prostate cancer (mCRPC; yellow) are highlighted. [file elife-77072-fig1-data1.xlsx]

## Sheet: Sheet1
Study	# Total	# Shallow CIC-ERF co-deletion	# Deep CIC-ERF co-deletion	% Altered
Fred Hutchinson CRC, Nat Med 2016	154	42	4	0.2987
MSKCC/DFCI, Nature Genetics 2018	1013	209	49	0.2547
SU2C/PCF Dream Team, Cell 2015	150	34	3	0.2467
SU2C/PCF Dream Team, PNAS 2019	444	84	11	0.214
MCTP, Nature 2012	61	11	?	0.1803
Broad/Cornell, Cell 2013	57	6	1	0.1223
TCGA, PanCancer Atlas	494	40	12	0.1053
TCGA, Firehose Legacy	499	16	36	0.1042
MSKCC, Cancer Cell 2010	213	12	2	0.0657
Provisional, June 2021	82	3	2	0.061
Broad/Cornell, Nat Genetics 2012	112	5	0	0.0446
MSK, Clin Cancer Res 2020	424	0	3	0.0071
MSK, Eur Urol 2020	1465	0	0	0.0068
MSKCC, Nat Med 2017	698	0	4	0.0057
mCRPC predominant
Primary predominant
