# Supplementary material for: The CIC-ERF co-deletion underlies fusion-independent activation of ETS family member, ETV1, to drive prostate cancer progression
Source: eLife. 2022 Nov 16;11:e77072. doi: 10.7554/eLife.77072 (PMC9668335; doi:10.7554/eLife.77072)
Supplement: Supplementary file 1. [file elife-77072-supp1.xlsx]

## Sheet: CIC_ERF_shared_gene_targets_Oct
Figure 4 - source data 1
#	Gene Symbol	#	Gene Symbol
1	SNORA59B	46	FOXL2
2	RUNX3	47	SHOX2
3	HIVEP3	48	IGF2BP2
4	LINC01138	49	ETV5
5	PTPRC	50	MIR2277
6	ATF3	51	PRDM6
7	RRP15	52	JADE2
8	BMI1	53	SPRY4
9	NKX2-3	54	ARHGAP26-AS1
10	WT1-AS	55	ADRA1B
11	MYEOV	56	HMGA1
12	TSKU	57	SIM1
13	CCDC81	58	IL20RA
14	MTMR2	59	ETV1
15	ZIC5	60	CRPPA
16	ZIC2	61	AGR2
17	FOS	62	MACC1-AS1
18	MEIS2	63	ITGB8
19	SPRED1	64	SP8
20	NR2F2	65	RPL23P8
21	IGF1R	66	RNU6-16P
22	PER1	67	HOXA13
23	MPRIP	68	HIBADH
24	HNF1B	69	JAZF1
25	PIP4K2B	70	IGFBP3
26	ETV4	71	EGFR
27	HDAC5	72	CCT6P3
28	UBALD2	73	INTS4P2
29	BAHCC1	74	GSTK1
30	GATA6-AS1	75	MNX1-AS1
31	HS1BP3	76	ESYT2
32	ACTR3BP2	77	DUSP4
33	CREG2	78	ST18
34	INSIG2	79	ZFHX4
35	RAPGEF4	80	HEY1
36	SP9	81	ZBTB10
37	TMEFF2	82	NACA4P
38	UQCC1	83	PVT1
39	TGM2	84	MIR1208
40	EYA2	85	TRAPPC9
41	ZNF217	86	MAFA
42	SUMO1P1	87	NFIB
43	LINC00649	88	ELAVL2
44	ACOX2	89	LOC100133920
45	CADM2	90	PTGES
		91	MBNL3
