# Supplementary figures and images for: The CIC-ERF co-deletion underlies fusion-independent activation of ETS family member, ETV1, to drive prostate cancer progression
Source: eLife journal article supplement (doi:10.7554/elife.77072), 2022-10-28

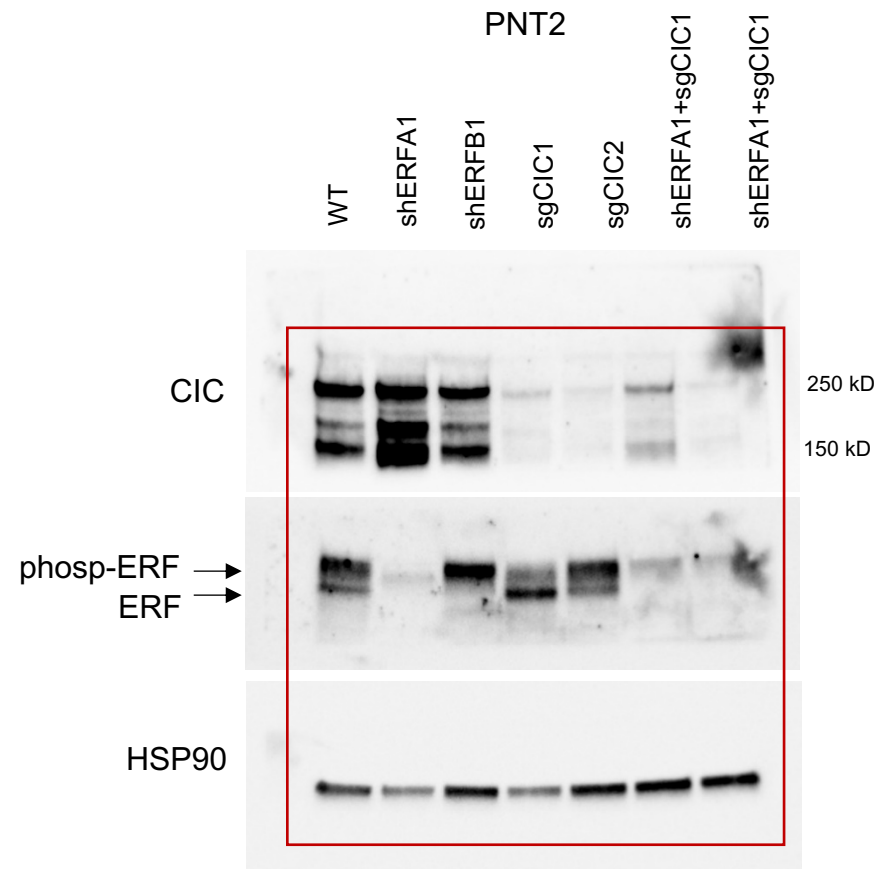

Supplement: fig2-figsupp1-data1 [file elife-77072-fig2-figsupp1-data1-v1.zip]

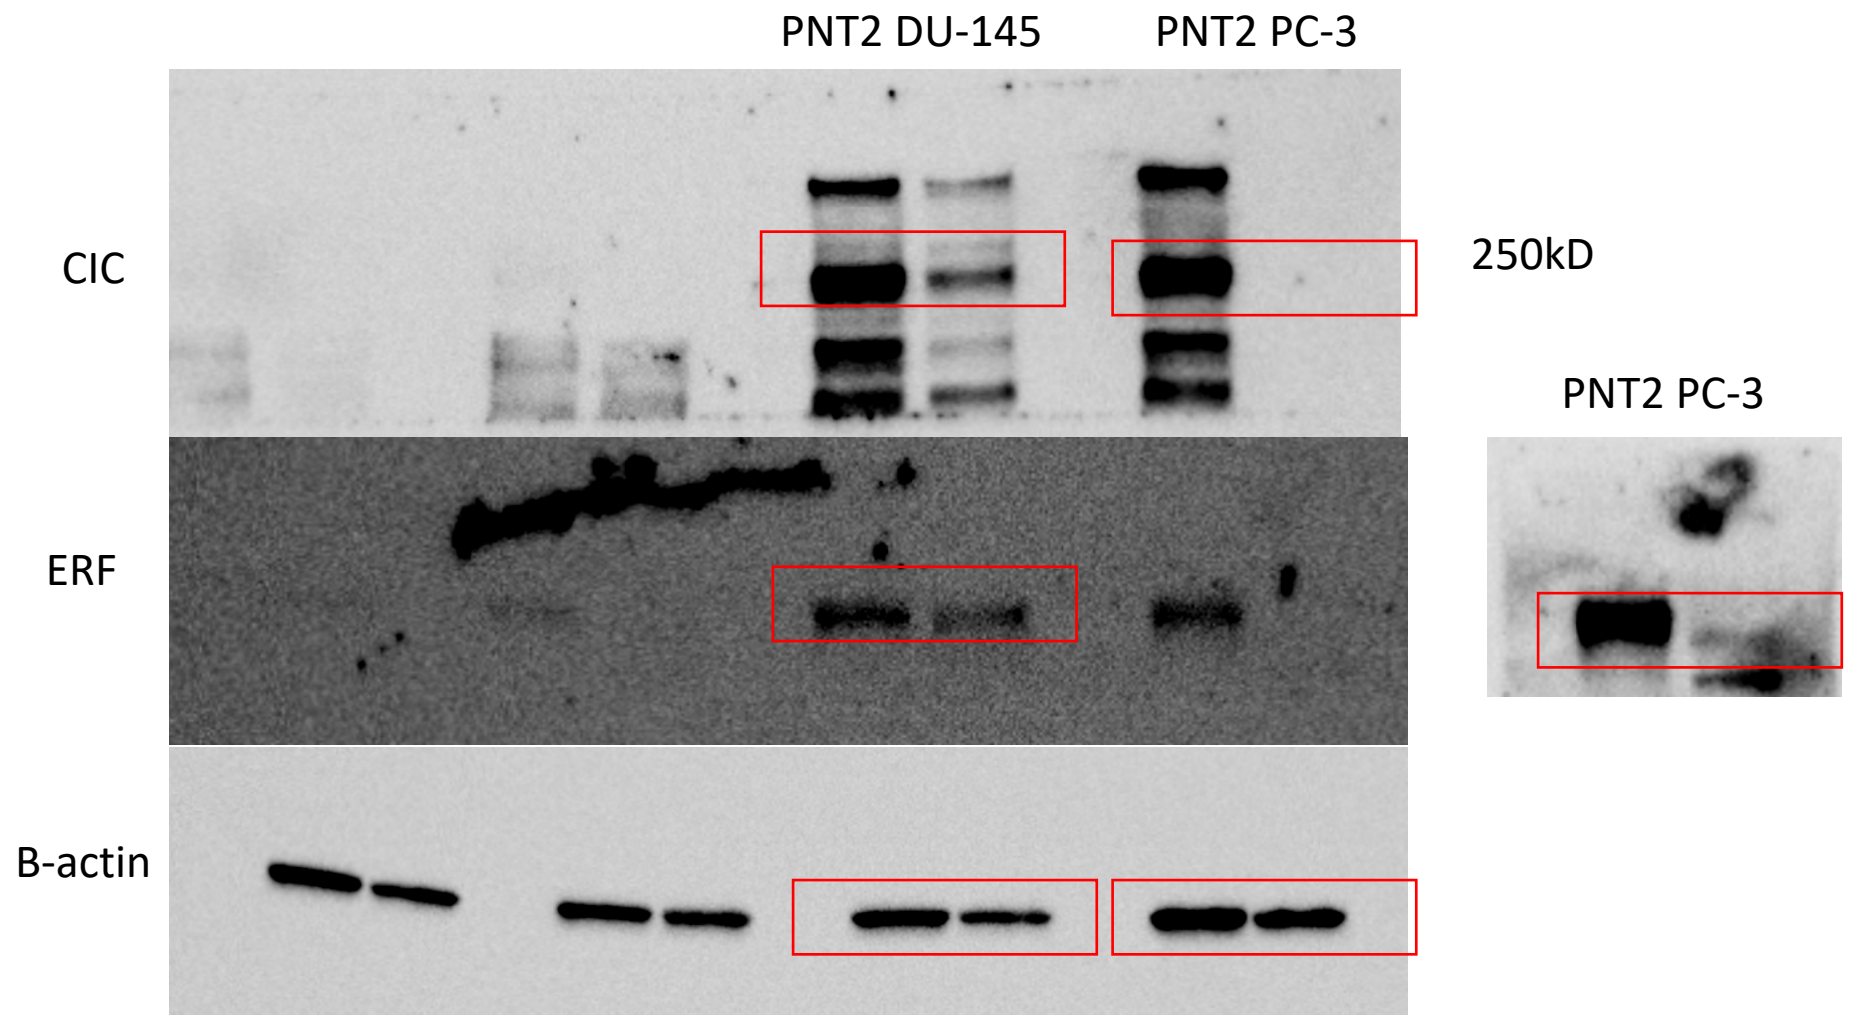

Supplement: fig3-figsupp1-data1 [file elife-77072-fig3-figsupp1-data1-v1.zip]

DU145

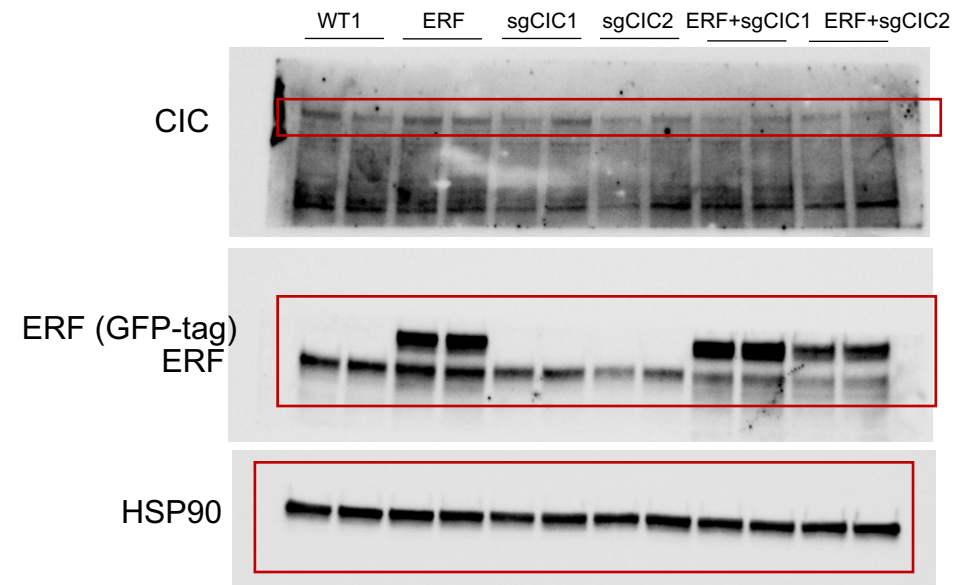

Supplement: fig3-figsupp1-data2 [file Supplementary figure 3-figure supplement C-Source data.pdf › Figure 3 - figure supplement 1 - source data 2/Supplementary figure 3-figure supplement C-Source data.pdf]
